# Supplementary material
Source: PubMed Central journal article supplement (PMC6803305)
Supplement: AEM.01367-19-s0001.pdf [file AEM.01367-19-s0001.pdf]

**CRISPR/Cas9-assisted seamless genome editing in *Lactobacillus plantarum* and its application in *N*-acetylglucosamine production**

Running title: seamless genome editing of *Lactobacillus plantarum*

Ding Zhou<sup>a</sup>, Zhennan Jiang<sup>b</sup>, Qingxiao Pang<sup>b</sup>, Yuan Zhu<sup>a</sup>, Qian Wang<sup>a,b</sup> \* Qingsheng Qi<sup>b, c</sup>

<sup>a</sup>National Glycoengineering Research Center, <sup>b</sup> State Key Laboratory of Microbial Technology, Shandong University, Qingdao 266237, P. R. China

<sup>c</sup> CAS Key Lab of Biobased Materials, Qingdao Institute of Bioenergy and Bioprocess Technology, Chinese Academy of Sciences, Qingdao 266101, P. R. China

Correspondence: qiqi20011983@gmail.com (Qian Wang)

**Table S1. Strains and plasmids used in this study**

| Strain or plasmid                    | Relevant characteristics                                                                                                    | References |
|--------------------------------------|-----------------------------------------------------------------------------------------------------------------------------|------------|
| <b>Strains</b>                       |                                                                                                                             |            |
| <i>Lactobacillus plantarum</i> WCFS1 | wild type                                                                                                                   | (1)        |
| <i>Escherichia coli</i> XL1-Blue     | subcloning host                                                                                                             | Transgen   |
| <i>E. coli</i> DH5 $\alpha$          | $\Delta lacZ M15 recA$                                                                                                      | Transgen   |
| <i>Lactococcus lactis</i> MG1363     | subcloning host                                                                                                             | (2)        |
| WG1                                  | <i>Lactobacillus plantarum</i> WCFS1<br>$\Delta nagB$                                                                       | this study |
| WG2                                  | <i>Lactobacillus plantarum</i> WCFS1<br>$\Delta nagB$ ; P <sub>3a</sub> :: <i>glmS1</i>                                     | this study |
| WG3                                  | <i>Lactobacillus plantarum</i> WCFS1<br>$\Delta nagB$ ; P <sub>3a</sub> :: <i>glmS1</i> <sup>G472S</sup>                    | this study |
| <b>Plasmids</b>                      |                                                                                                                             |            |
| pNZ8148                              | source of chloramphenicol-resistance gene <i>cat</i>                                                                        | lab stock  |
| pSIP403                              | <i>spp</i> -based inducible expression vector; 256rep and pUC(pGEM)ori; Ery <sup>R</sup> ; P <sub>sppA</sub> :: <i>gusA</i> | (3)        |
| pSIP411                              | <i>spp</i> -based inducible expression vector; SH71 <sub>rep</sub> ; Ery <sup>R</sup> ; P <sub>orfX</sub> :: <i>gusA</i>    | (3)        |
| pLP-gba                              | pSIP411 derivative, P <sub>orfX</sub> :: <i>lp_0640-lp_0641-lp_0642</i>                                                     | (4)        |
| pLP-cre                              | pSIP411 derivative, P <sub>orfX</sub> :: <i>cre</i>                                                                         | (4)        |
| p99S-Cas9                            | source of Cas9 gene and sgRNA                                                                                               | (5)        |
| pNnsGM                               | pTrc99a, harboring <i>nanA</i> , <i>slr1975</i> , GNA1 and mutant <i>glmS</i> gene                                          | (6)        |
| pSIP-C9 ( <i>nagB</i> )              | pSIP403 derivative, P <sub>sppA</sub> :: <i>Cas9</i> , P <sub>3a</sub> :: sgRNA ( <i>nagB</i> ), Cm <sup>R</sup>            | this study |
| pSIP-C9 (lox)                        | pSIP403 derivative, P <sub>sppA</sub> :: <i>Cas9</i> , P <sub>3a</sub> :: sgRNA (lox), Cm <sup>R</sup>                      | this study |
| pSIP-C9 (472)                        | pSIP403 derivative, P <sub>sppA</sub> :: <i>Cas9</i> , P <sub>3a</sub> :: sgRNA (472), Ery <sup>R</sup>                     | this study |
| p411-RecT                            | pSIP411 derivative, P <sub>orfX</sub> :: RecT, Cm <sup>R</sup>                                                              | this study |
| p411-RecT-Dam                        | pSIP411 derivative, P <sub>orfX</sub> :: RecT and Dam, Cm <sup>R</sup>                                                      | this study |

**Table S2. Oligonucleotides used in this study.**

| Primer                    | Sequence(5'-3')                                                                                                                                   |
|---------------------------|---------------------------------------------------------------------------------------------------------------------------------------------------|
| 403-Cas9-f                | <u>AAGTATGCTTTATAAAATAATATATATAGGAGTATGATTCCC</u> cgagct<br>TTTAGGAGGCAAAAATGGA                                                                   |
| Cas9-3a-r                 | <u>CGCAACTATTAAGTTTATCATCATCAGAACAAGCTGTCAACATC</u><br>TTTTTATAACCAGAAATCATCCTTAGCGAAAGCT<br><u>CTGATGATGATAAACTTTAATAGTTGCGACTAGTACACCCAATTG</u> |
| 3a-gRNA ( <i>nagB</i> )-f | <u>ACTTACAAATCTTAGGGATGTTTTAGAGCTAGAAATAGCAAGTTA</u><br>AAATAAGGCT<br><u>CTGATGATGATAAACTTTAATAGTTGCGACTAGTTACCGTTCGTAT</u>                       |
| 3a-gRNA( <i>lox</i> )-f   | <u>AGCATACATTATACGAAGTTTTAGAGCTAGAAATAGCAAGTTAAA</u><br>ATAAGGCT<br><u>CTGATGATGATAAACTTTAATAGTTGCGACTAGTCTTATTGAATAC</u>                         |
| 3a-gRNA(472)-f            | <u>GCCAAACGCCTTTTATAATGTTTTAGAGCTAGAAATAGCAAGTTAA</u><br>AATAAGGCT<br><u>TGGCGCCTTCGAACCCGGGGTACCGATAAAAACGAAAGGCCAG</u>                          |
| sgRNA-403-r               | TCTTTTCG                                                                                                                                          |
| RecT-f                    | ATGAGTAATGAGCTAGTTACGATGGTTAAT                                                                                                                    |
| RecT-r                    | <u>GGGTACCGAATTCCTCGAGTCTAGATTAGCTGGCGTCAAAGTCTC</u><br>CG                                                                                        |
| p411-f                    | TCTAGACTCGAGGAATTCGGTACCC                                                                                                                         |
| p411-r                    | <u>ATTAACCATCGTAACTAGCTCATTACTCATGGCTAAAATCTCCTTG</u><br>TAATAGTATTTTATAGAAT                                                                      |
| cm-f                      | <u>AACAAATCGTTTAACTTCAGGAGAGATTACATGAACTTTAATAAA</u><br>ATTGATTTAGACAATTGGAAGAGAA                                                                 |
| cm-r                      | <u>TTTCCAAATTTAAAAAAGCGACTCATAGAATTATAAAAGCCAGTC</u><br>ATTAGGCCTATCTGA                                                                           |
| p411-cm-f                 | TTCTATGAGTCGCTTTTTTAAATTTGGAAAGTT                                                                                                                 |
| p411-cm-r                 | GTAATCTCTCCTGAAGTTAAACGATTTGTT                                                                                                                    |
| Dam-f                     | <u>CTTTGACGCCAGCTAATCTAGACTCGAGGTAACAGATTTCGCAAG</u><br><u>TAAGGAGTTTATATAT</u> CTGGCACAAGCAGAAACCG                                               |
| Dam-r                     | TGCGTTCTCACTGGATGCTGTTCT                                                                                                                          |
| <i>nagB</i> -cf           | GTGAACAAATAAATGGTTGGCGTAG                                                                                                                         |
| <i>nagB</i> -cr           | CCTACCGCTACACCGCAAC                                                                                                                               |
| 3a-cf                     | GAGACCCAGTGCCTCCCAAAC                                                                                                                             |
| 3a-cr                     | GTGGTAACAAATGCGTCTGCAC                                                                                                                            |
| 472-cr                    | AAGGTCGCTGGTATTCGCCA                                                                                                                              |
| 472-cf                    | CAACGCTATCGCGGAAGCAA                                                                                                                              |
| rpob-cf                   | GGATGGAACGGGTTGTGCG                                                                                                                               |
| rpob-cr                   | TTGCTGGACCATCGGCTAA                                                                                                                               |
| cm-cf                     | GGTGGCTACGTATTGACGGAAC                                                                                                                            |
| cm-cr                     | CTCTCCGTCGCTATTGTAACCAG                                                                                                                           |

|                |                                                                                                                                                                                        |
|----------------|----------------------------------------------------------------------------------------------------------------------------------------------------------------------------------------|
| cm-cre-cf      | GAGACCCAGTGCCTCCCAAAC                                                                                                                                                                  |
| cm-cre-cr      | TTGAAGCCTTCGCCGACCC                                                                                                                                                                    |
| nagB-f         | AGTGCTTGACCGATGGGAGA                                                                                                                                                                   |
| nagB-r         | TCTTTTCCGCCGGCAGCTTGATC                                                                                                                                                                |
| nagB-f2        | <u>AGGATCAAGCTGCCGGCGGAAAAGAGACGAAGCGGCTGCTAGC</u><br>AA                                                                                                                               |
| nagB-r2        | AACTGAAACCACTGCCACCAA                                                                                                                                                                  |
| 3a-f1          | GCTGGAAGAAGCCTTGATTG                                                                                                                                                                   |
| 3a-r1          | CCGCTTTAACCAATTAACAATTGGTC                                                                                                                                                             |
| 3a-f2          | <u>GACCAATTGTTAATTGGTTAAAGCGG</u> <u>TACCGTTCGTATAATGTATG</u><br><u>CTATACGAAGTTAT</u> TGATCCCCTTAGAAGCAAACCTTAAGAGT<br><u>ATCATCATCAGAACAAGCTGTCAACATCTTTTTATAA</u> <u>TACCGTTTCG</u> |
| 3a-r2          | <u>TATAGCATA CATTAT</u> ACGAAGTTATGCTCACCAACAACCTATCTTA<br>ACGAG                                                                                                                       |
| 3a-f3          | <u>GTTGACAGCTTGTTCTGATGATGATAAACTTTAATAGTTGCGTGA</u><br>GGTTGGTGACAGATATATTGACCACG                                                                                                     |
| 3a-r3          | TTCGCCAAGTTTGTTCCTCT                                                                                                                                                                   |
| lox-r1         | <u>ATCATCATCAGAACAAGCTGTCAACATCTTTTTATAACCGCTTTA</u><br>ACCAATTAACAATTGGTC                                                                                                             |
| lox-f2         | <u>GTTGACAGCTTGTTCTGATGATGATAAACTTTAATAGTTGCGTGA</u><br>GGTTGGTGACAGATATATTGACCACG                                                                                                     |
| g-f            | <u>TAAAATAATATATAGGAGTATGATTCCCATGATACCAGCACAGGC</u><br>AGGTTTAAAC                                                                                                                     |
| ssDNA-472-5    | AAGGCCGTTTCTAATGAGACGGCGTAATCCAGTCCCC <u>TTGATATA</u><br>TAAAAGGCGTTTGGCGTATTCAATAAGGCACTCT                                                                                            |
| ssDNA-472-3    | AAGGCCGTTTCTAATGAGACGGCGTAATCCAGTCCCCG <u>TGA</u> AAT<br>ATAAAAGGCGTTTGGCGTATTCAATAAGGCACTCT                                                                                           |
| ssDNA-rpob-1   | TCAAACCACCAGGTCCTAAGGCTGATAAACGCCGCTTA <u>CGCGTT</u><br>AATTCACCTAAGGGGTTGGTTTGGTCCATGAATTG                                                                                            |
| ssDNA-rpob-2   | TCAAACCACCAGGTCCTAAGGCTGATAAACGCCGCTT <u>CCGCGTT</u><br>AATTCACCTAAGGGGTTGGTTTGGTCCATGAATTG                                                                                            |
| ssDNA-rpob-3   | TCAAACCACCAGGTCCTAAGGCTGATAAACGCCGCTT <u>CCTCGTT</u><br>AATTCACCTAAGGGGTTGGTTTGGTCCATGAATTG                                                                                            |
| ssDNA-rpob-4   | TCAAACCACCAGGTCCTAAGGCTGATAAACGCCGCTT <u>CCTAGTT</u><br>AATTCACCTAAGGGGTTGGTTTGGTCCATGAATTG                                                                                            |
| ssDNA-rpob-5   | TCAAACCACCAGGTCCTAAGGCTGATAAACGCCGCTT <u>CCTGCTT</u><br>AATTCACCTAAGGGGTTGGTTTGGTCCATGAATTG                                                                                            |
| ssDNA-rpob-3+N | TCAAACCACCAGGTCCTAAGGCTGATAAACGCCGCTT <u>NCGGCTT</u><br>AATTCACCTAAGGGGTTGGTTTGGTCCATGAATTG                                                                                            |

Underlined sequences indicate homology arms for Gibson assembly. Wavy underlined sequences indicate spacers

for sgRNA. Yellow background sequence indicates RBS. Dark blue background sequences indicate lox site. Red

coloured words indicate mutant bases.

**Figure S1. The efficiency of the two-step gene insertion.**

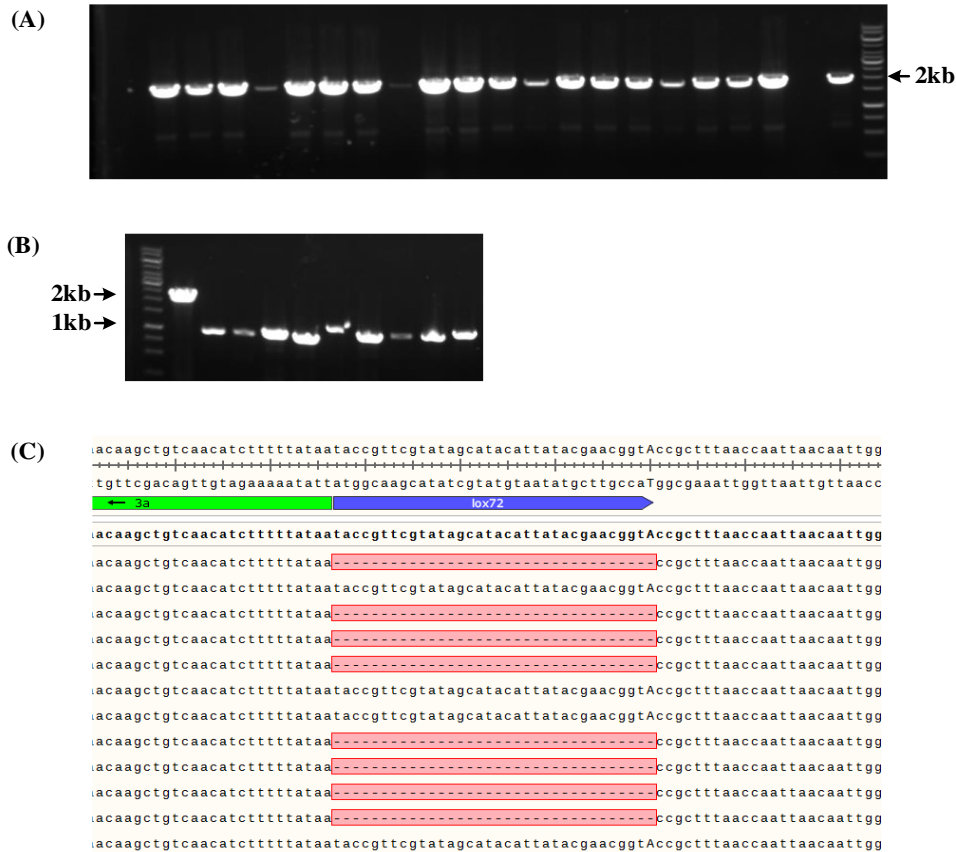

(A) The efficiency of the two-step gene insertion was also divided into two parts. The efficiency of the first step that insertion of the chloramphenicol resistance gene, loxP sites and the 3a promoter was 82% as shown in the Supplementary Figure 1A. We use primers cm-cf/cm-cr to verify this result, the primer cm-cr is located on the inserted chloramphenicol gene and there is no band if it is not inserted successfully. (B) The results of removing the chloramphenicol label using the loxP / Cre system. We verify this result with primers cm-cre-cf/cm-cre-cr. The strains was cultured for 24 hours after transformation of Cre enzyme, all of the nine tested colonies showed the mutant genotype and could not grow on chloramphenicol-containing media, the first band is a negative control. (C) The second step is CRISPR-assisted seamless genome knockout of loxP sites, 57 colonies were obtained on the plate and in 24 tested colonies, 14 were correct mutants identified by colony PCR and sequenced. The positive rate is 58.3%. Part of the sequencing results are shown in the Supplementary Figure 1C.

**Figure S2. Partial DNA sequencing results of point mutations G472S.**

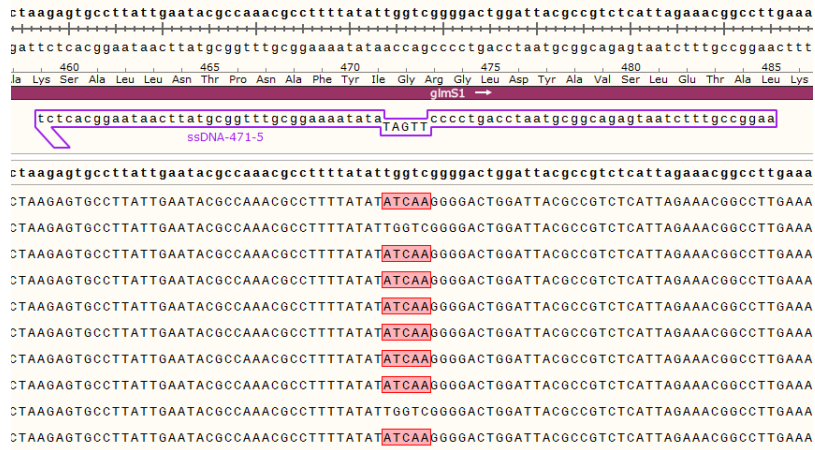

The ssDNA recombineering result was verified by PCR using primers 472-cf/472-cr. The sequencing results was

shown above.

**Figure S3. Mutation efficiency of interval mismatches ssDNA.**

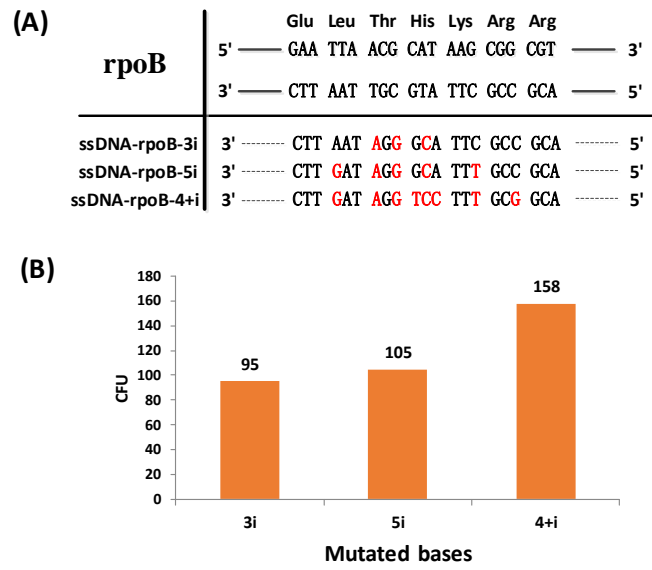

(A)The ssDNA with various interval mutant bases marked red were used to change the genome. (B)The efficiency of ssDNA recombination resulting in various mismatches.

**Figure S4. The recombination efficiency of different bases.**

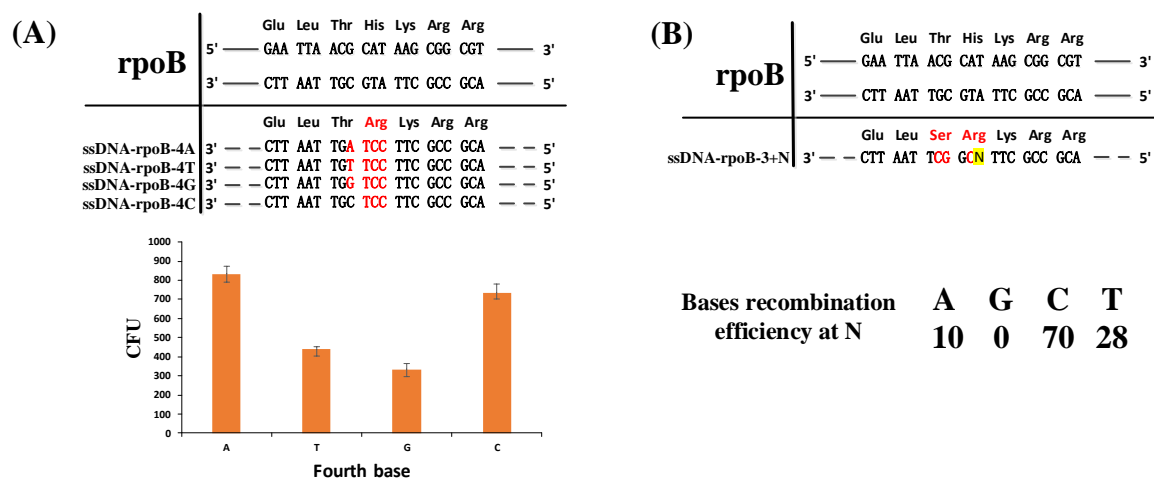

(A) The fourth base is a degenerate base, we design single-stranded DNAs named ssDNA-rpoB-4A/G/C/T to verify the mismatch efficiency of each base at this site. When the fourth base is A, the mismatch efficiency is the highest and single colonies can achieve about 800 on rifampicin-resistant plates which is probably twice the other bases.

(B) We designed an ssDNA named ssDNA-rpoB-3+N (N=A/G/C/T) to calculate the mismatch efficiency of this site. After transformation of ssDNA, we got single colonies growing on plates containing rifampicin resistance and sequenced the genome of single colonies to calculate the number of bases that appeared in the position of yellow bottom N. The mismatch efficiency towards base C is the highest, while base G is the lowest.



## References

1. Kleerebezem M, Boekhorst J, van Kranenburg R, Molenaar D, Kuipers OP, Leer R, Turchini R, Peters SA, Sandbrink HM, Fiers MW, Stiekema W, Lankhorst RM, Bron PA, Hoffer SM, Groot MN, Kerkhoven R, de Vries M, Ursing B, de Vos WM, Siezen RJ. 2003. Complete genome sequence of *Lactobacillus plantarum* WCFS1. Proc Natl Acad Sci U S A 100:1990-5.
2. Wegmann U, O'Connell-Motherway M, Zomer A, Buist G, Shearman C, Canchaya C, Ventura M, Goesmann A, Gasson MJ, Kuipers OP, van Sinderen D, Kok J. 2007. Complete genome sequence of the prototype lactic acid bacterium *Lactococcus lactis* subsp. cremoris MG1363. J Bacteriol 189:3256-70.
3. Sorvig E, Mathiesen G, Naterstad K, Eijsink VG, Axelsson L. 2005. High-level, inducible gene expression in *Lactobacillus sakei* and *Lactobacillus plantarum* using versatile expression vectors. Microbiology 151:2439-49.
4. Yang P, Wang J, Qi Q. 2015. Prophage recombinases-mediated genome engineering in *Lactobacillus plantarum*. Microb Cell Fact 14:154.
5. Su T, Jin H, Zheng Y, Zhao Q, Chang Y, Wang Q, Qi Q. 2018. Improved ssDNA recombineering for rapid and efficient pathway engineering in *Corynebacterium glutamicum*. Journal of Chemical Technology & Biotechnology 93:3535-3542.
6. Kang J, Gu P, Wang Y, Li Y, Yang F, Wang Q, Qi Q. 2012. Engineering of an N-acetylneuraminic acid synthetic pathway in *Escherichia coli*. Metab Eng 14:623-9.
